# Supplementary material for: Non-destructive estimates of soil carbonic anhydrase activity and soilwater oxygen isotope composition
Source: Copernicus journal article supplement (doi:10.5194/hess-2017-453), 2017-08-08
Supplement: Supplementary file 1 [file hess-2017-453-supplement.pdf]

## Supplementary material

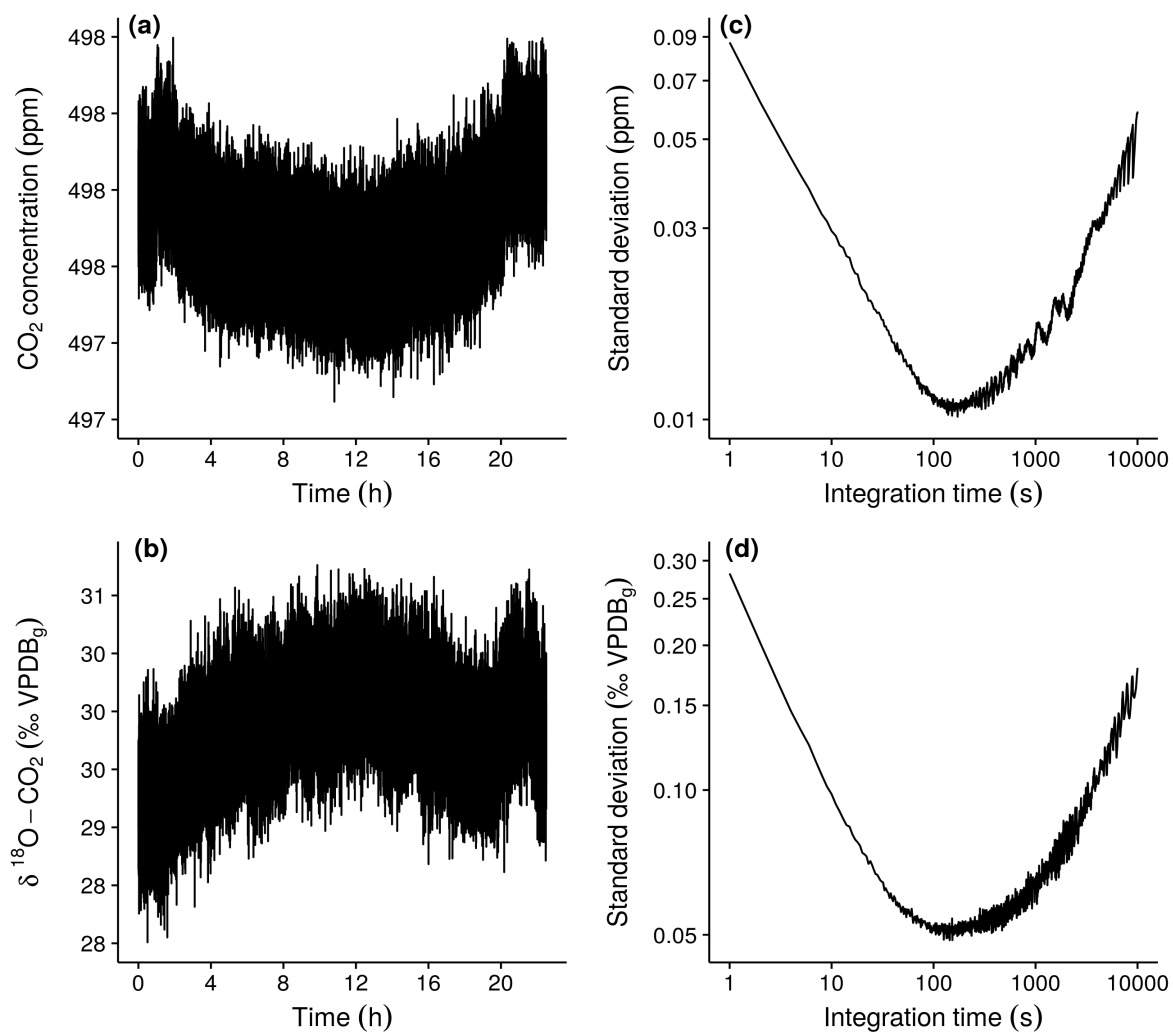

Figure S1: IRIS measurement stability for a cylinder of compressed air containing about 500 ppm of CO<sub>2</sub>. (a) 1 Hz time-series of total CO<sub>2</sub> concentration, (b) 1 Hz time-series of δ<sup>18</sup>O of CO<sub>2</sub>, (c) Allan plot of total CO<sub>2</sub> concentration and (d) Allan plot of δ<sup>18</sup>O of CO<sub>2</sub>.

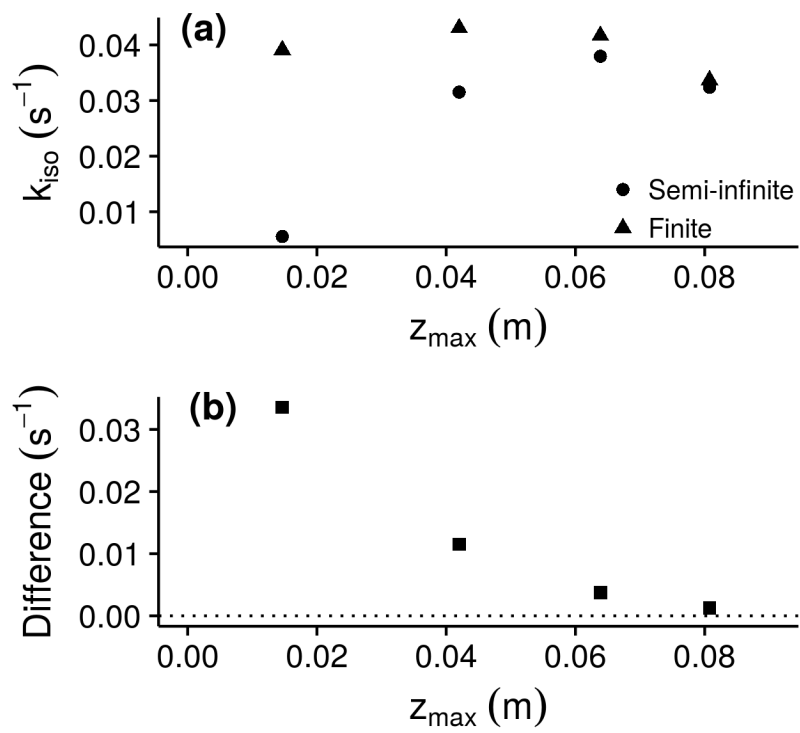

Figure S2: The influence of extending Eq. 1 to account for boundary conditions found at the bottom of incubation vessels (Eq. 7) was tested in four incubations containing 70, 100, 300 and 400 g of soil ( $\theta_w = 0.11$  to 0.12). Solutions for  $v_{\text{inv}}$  and  $\tilde{v}_{\text{inv}}$  and the corresponding semi-infinite and finite estimates of  $k_{\text{iso}}$ , calculated as described in the manuscript (a)  $k_{\text{iso}}$  estimates using the semi-infinite and the finite-depth solutions for different soil depths and (b) their difference.
